# Supplementary material
Source: Springer Nature journal article supplement (https://www.springermedizin.de/resource/supplementary/13054_2013_3010_MOESM1_ESM.pdf/9712378)
Supplement: MOESM1 [file 9712378]

Patients admitted to the ICU during the study period (n=5306)

Excluded (n=2920)  
< 18 years (n=537)  
> 74 years (n=200)  
< 24 hours (n=2183)

Patients assessed for eligibility (n=2386)

Excluded (n=923)  
Died in the ICU (n=265)  
Died in hospital (n=367)  
Died after discharge <6 months (n=150)  
Patients readmitted to ICU (n= 141)

Alive 6 months after discharge (n=1463)

Lost to follow up (n=683)  
Refused (n= 409)  
No reply (n=247)  
Address unknown (n=27)

Participated at 6 months age 18-74 (n=780)

No comorbid condition (n=234)

One comorbid condition (n=316)

More than 1 comorbid condition (n=230)
